# Supplementary material
Source: PubMed Central journal article supplement (PMC10524337)
Supplement: NIHMS1899923-supplement-Supplemental_material.pdf [file NIHMS1899923-supplement-Supplemental_material.pdf]

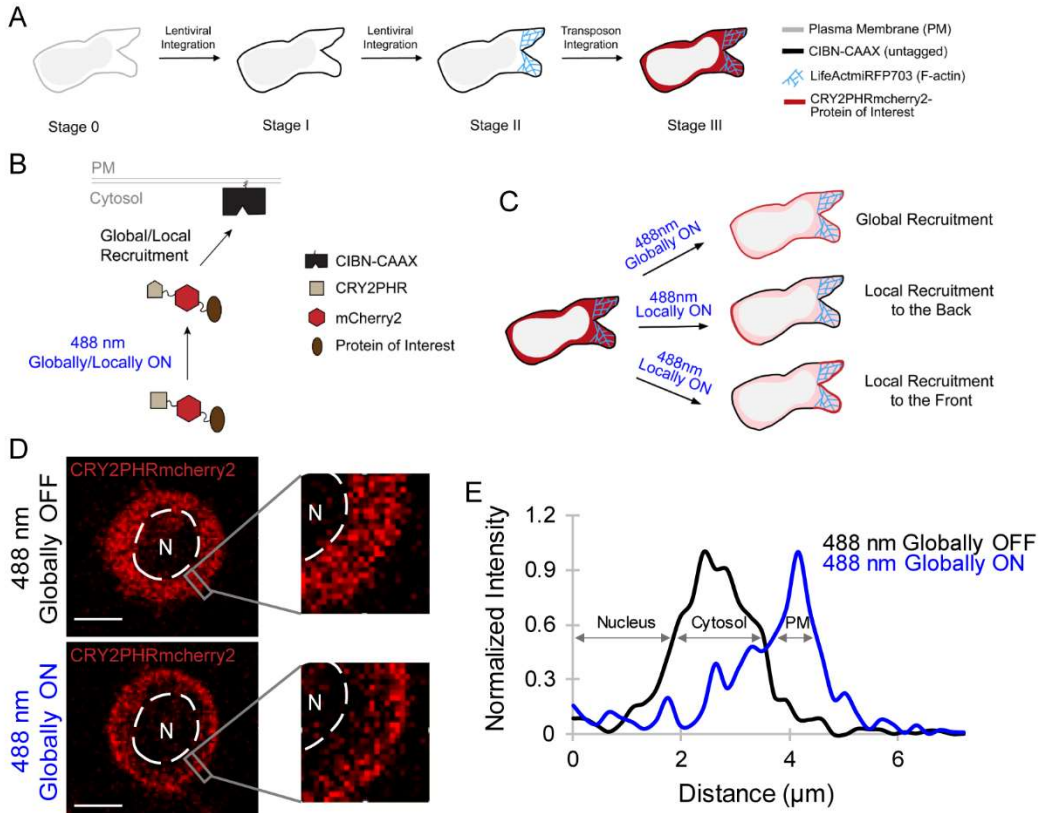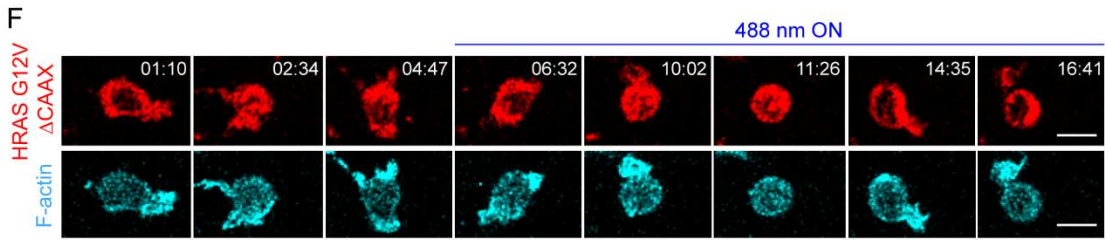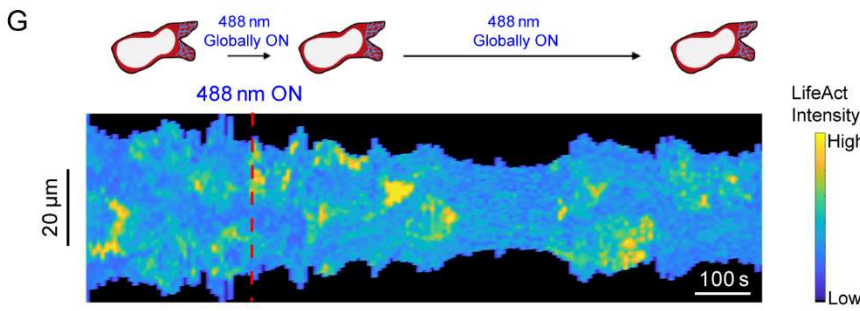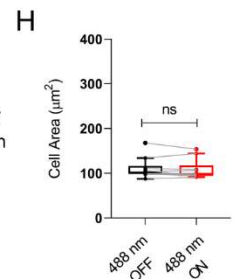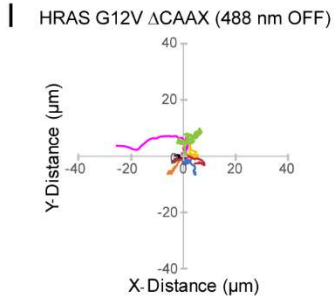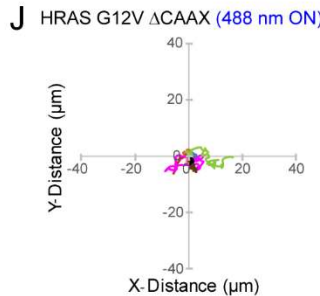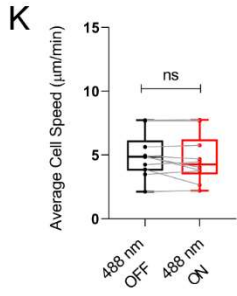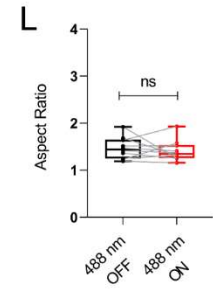

**Figure S1. Construction of CRY2-CIBN optogenetic system and cytosolic form of constitutively active HRas does not affect neutrophil polarity and migration.** Related to STAR Methods and Figure 1. **(A)** Cartoon showing stepwise introduction of CRY2-CIBN optogenetics in HL-60 cells. In wild type HL-60 cells (Stage 0), CIBN-CAAX membrane anchor (Stage I) and F-actin polymerization biosensor, LifeActmiRFP703 (Stage II), were introduced sequentially by lentiviral integration. These cells were used to express cytosolic CRY2PHR-mcherry2 fused with protein of interest by transposon-based integration (Stage III). **(B)** Schematic demonstrating recruitment of cytosolic CRY2PHR-mcherry2 fused with protein of interest to the membrane CIBN-CAAX by local or global illumination with 488 nm laser. **(C)** Depending on the region of the membrane where 488 nm laser was applied, CRY2PHR-mcherry2-protein of interest fusion was recruited all over the cell periphery (global recruitment), or specifically to the back or front of the cell. **(D)** Representative cell showing CRY2PHR-mcherry2 in the cytosol when 488 nm laser was off (top panel). Once light was switched on, CRY2PHR-mcherry2 translocated evenly to the periphery (bottom panel). The circular dashed line region with 'N' denotes the large nucleus in these cells. Images are representative of many cells from at least three independent experiments. Scale bars represent 5  $\mu\text{m}$ . **(E)** Linescan across the cytosol and membrane of the cell (denoted by white box in D), before (black) or after (blue) 488 nm laser was switched on globally. There is a distinct shift in CRY2PHR-mcherry2 intensity peak from cytosol to plasma membrane (PM) when laser was on. **(F)** Time-lapse confocal images of differentiated HL-60 neutrophil expressing CRY2PHR-mcherry2-HRas G12V  $\Delta$ CAAX (red; upper panel) and LifeActmiRFP703 (cyan; lower panel), before or after 488 nm laser was switched on globally. No appreciable HRas G12V  $\Delta$ CAAX recruitment was observed presumably due to low expression of CIBN-CAAX membrane anchor. Time in min:sec format. Scale bars represent 5  $\mu\text{m}$ . **(G)** Representative kymograph of cortical LifeAct intensity in HRas G12V  $\Delta$ CAAX-expressing neutrophil before or after 488 nm laser was turned on. A linear color map shows that blue is the lowest LifeAct intensity whereas yellow is the highest. Duration of the kymograph is 17 mins. Cartoon depicts recruitment, F-actin polymerization or cell shape status corresponding to the kymograph. **(H)** Box-and-whisker plot of neutrophil cell area before (black) or after (red) 488 nm laser was turned on.  $n_c=10$  from at least 3 independent experiments; ns denotes  $P>0.05$  (Wilcoxon-Mann-Whitney rank sum test). Centroid tracks of neutrophils ( $n_c=10$ ) showing random motility before **(I)** or after **(J)** 488 nm laser was turned on. Each track lasts at least 5 mins and was reset to same origin. Box-and-whisker plots of neutrophil speed **(K)** and aspect ratio **(L)** before (black) or after (red) 488 nm laser was switched on.  $n_c=10$  from at least 3 independent experiments; ns denotes  $P>0.05$  (Wilcoxon-Mann-Whitney rank sum test).

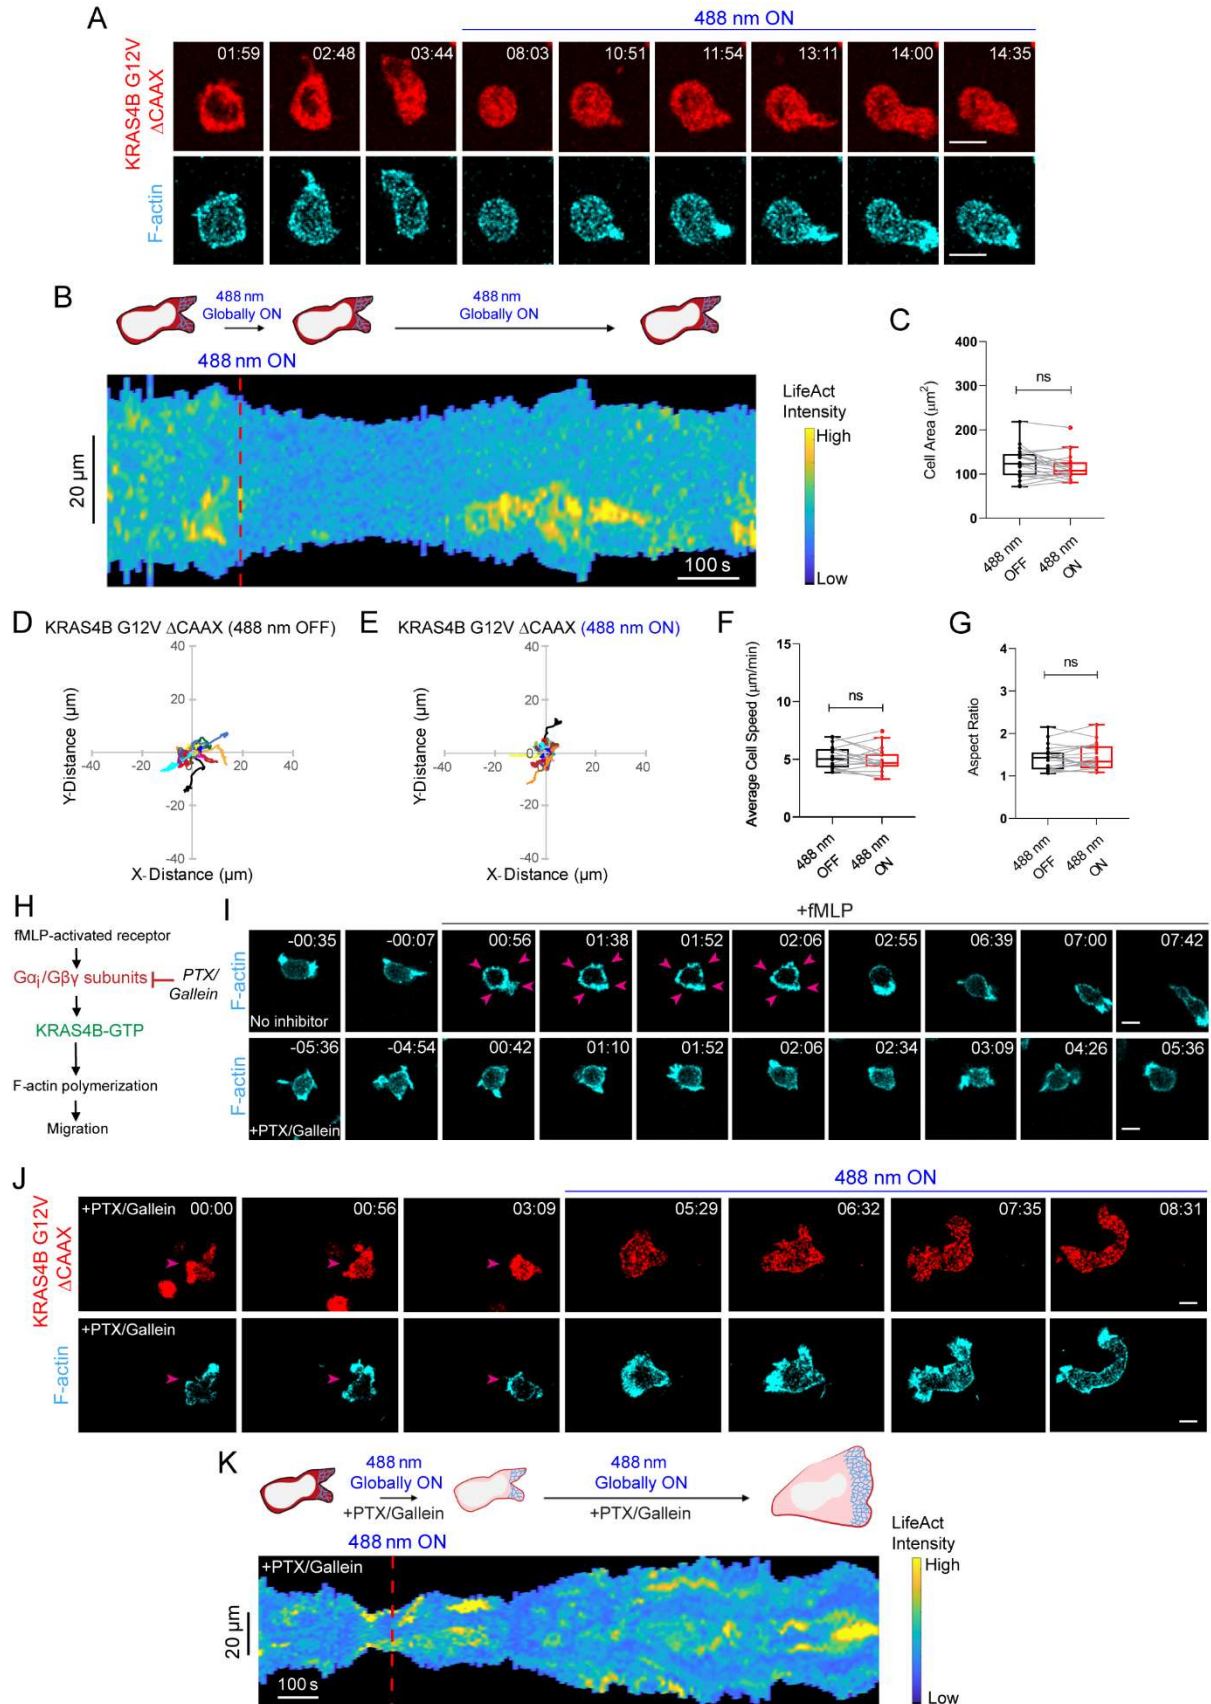

**Figure S2. Constitutively active KRas4B, only when recruited on cell membrane, promotes neutrophil polarity and migration even in absence of G-protein signaling.** Related to Figure 1. **(A)** Time-lapse confocal images of differentiated neutrophil expressing CRY2PHR-mcherry2-KRas4B G12V  $\Delta$ CAAX (red; upper panel) and LifeActmiRFP703 (cyan; lower panel), before or after 488 nm laser was switched on globally. No appreciable KRas4B G12V  $\Delta$ CAAX recruitment was observed presumably due to low expression of CIBN-CAAX membrane anchor. Time in min:sec format. Scale bars represent 5  $\mu$ m. **(B)** Representative kymograph of cortical LifeAct intensity in KRas4B G12V  $\Delta$ CAAX -expressing neutrophil before or after 488 nm laser was turned on. A linear color map shows that blue is the lowest LifeAct intensity whereas yellow is the highest. Duration of the kymograph is 15 mins. Cartoon depicts recruitment, F-actin polymerization or cell shape status corresponding to the kymograph. **(C)** Box-and-whisker plot of neutrophil cell area before (black) or after (red) 488 nm laser was turned on.  $n_c=20$  from at least 3 independent experiments; ns denotes  $P>0.05$  (Wilcoxon-Mann-Whitney rank sum test). Centroid tracks of neutrophils ( $n_c=20$ ) showing random motility before **(D)** or after **(E)** 488 nm laser was turned on. Each track lasts at least 5 mins and was reset to same origin. Box-and-whisker plots of neutrophil speed **(F)** and aspect ratio **(G)** before (black) or after (red) 488 nm laser was switched on.  $n_c=20$  from at least 3 independent experiments; ns denotes  $P>0.05$  (Wilcoxon-Mann-Whitney rank sum test). **(H)** Experimental scheme testing if KRas4B G12V  $\Delta$ CAAX activity, in absence of G-protein signaling, promotes F-actin polymerization and migration. A combination of G $\alpha$ i and G $\beta$  $\gamma$  inhibitors, pertussis toxin (PTX) and gallein respectively, were used to test this. **(I)** Time-lapse confocal images of untreated (upper panel) or PTX/gallein-treated (lower panel) HL-60 neutrophil expressing LifeActmiRFP703 (cyan), before or after a uniform stimulus of 100 nM fMLP was applied. Within a minute of fMLP addition, we observed a global burst of F-actin polymerization, as indicated with increased LifeActmiRFP703 on the membrane (shown with pink arrows), in untreated cells. This did not occur in cells pre-treated with G $\alpha$ i/ G $\beta$  $\gamma$  inhibitors. Images are representative of many cells from at least three independent experiments. Time in min:sec format. Scale bars represent 5  $\mu$ m. **(J)** Time-lapse confocal images of PTX/gallein-treated HL-60 neutrophil expressing CRY2PHR-mcherry2-KRas4B G12V  $\Delta$ CAAX (red; upper panel) and LifeActmiRFP703 (cyan; lower panel), before or after 488 nm laser was turned on globally. Pink arrows denote representative cell. Images are representative of many cells from at least three independent experiments. Time in min:sec format. Scale bars represent 5  $\mu$ m. **(K)** Representative kymograph of cortical LifeAct intensity in PTX/gallein-treated KRas4B G12V  $\Delta$ CAAX-expressing neutrophil before or after 488 nm laser was turned on. A linear color map shows that blue is the lowest LifeAct intensity whereas yellow is the highest. Duration of the kymograph is 10 mins. Cartoon depicts membrane recruitment, actin polymerization or cell shape status corresponding to the kymograph.

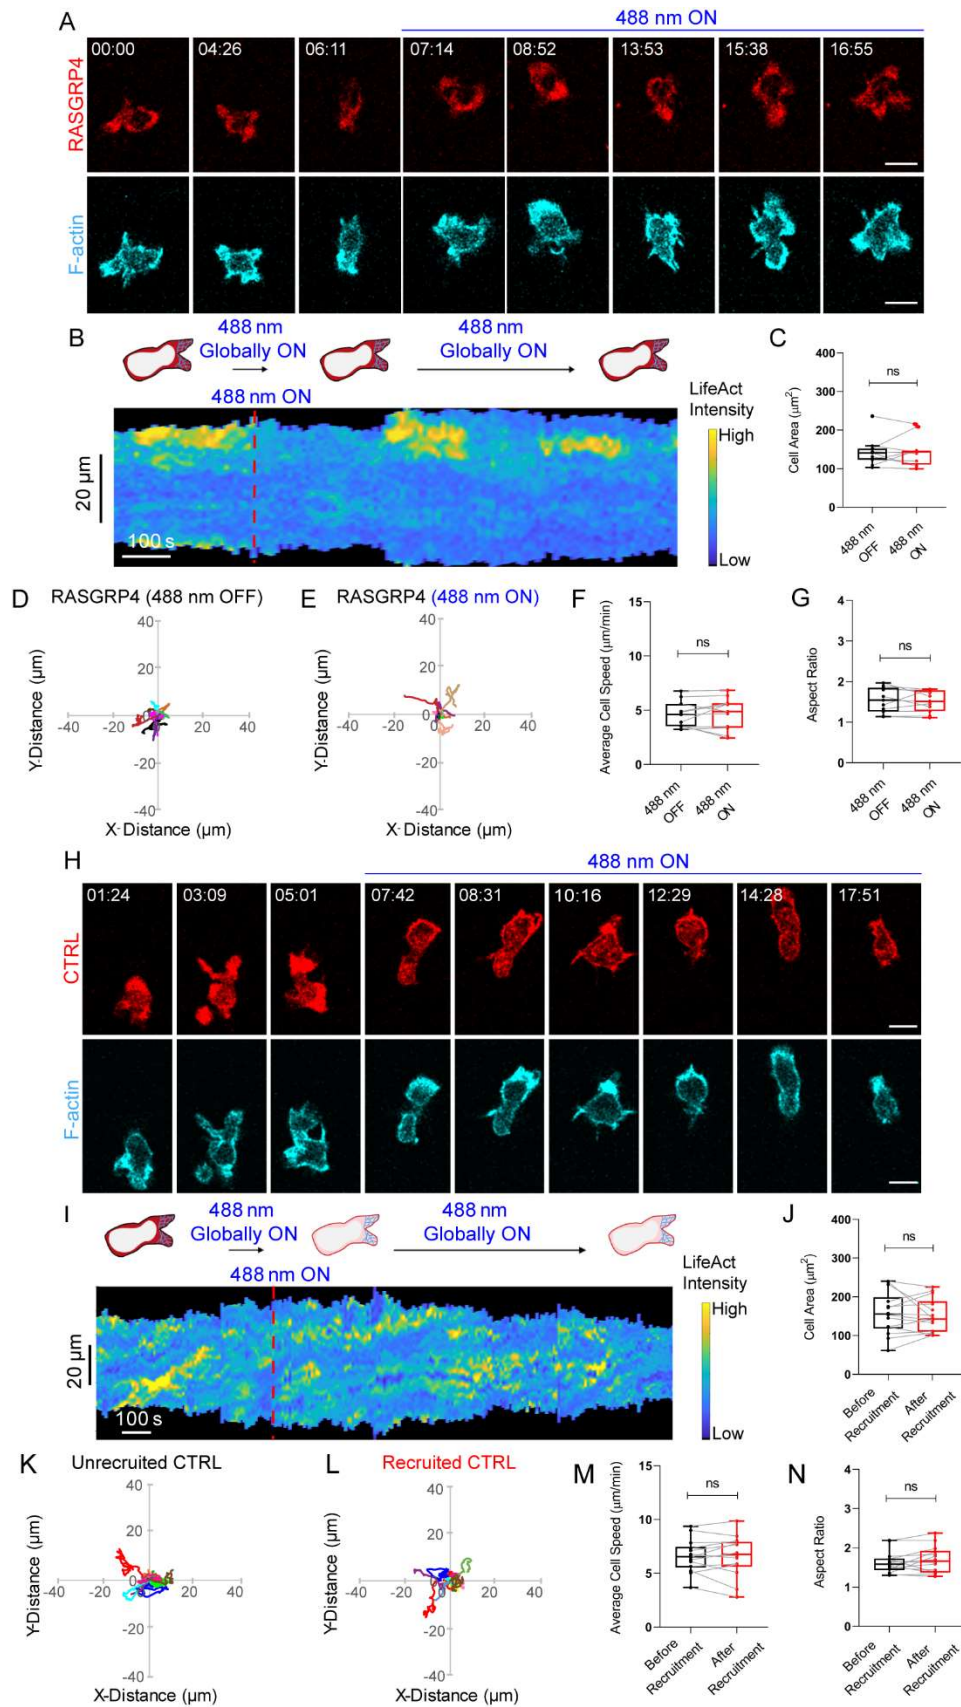

**Figure S3. Cytosolic RasGRP4 or empty CRY2PHR recruitment does not improve polarity and migration.** Related to Figures 1 and 2. **(A)** Time-lapse confocal images of differentiated HL-60 neutrophil expressing CRY2PHR-mcherry2-RasGRP4 (red; upper panel) and LifeActmiRFP703 (cyan; lower panel), before or after 488 nm laser was switched on globally. No appreciable RasGRP4 recruitment was observed presumably due to low expression of CIBN-CAAX membrane anchor. Time in min:sec format. Scale bars represent 5  $\mu\text{m}$ . **(B)** Representative kymograph of cortical LifeAct intensity in RasGRP4-expressing neutrophil before or after 488 nm laser was turned on. A linear color map shows that blue is the lowest LifeAct intensity whereas yellow is the highest. Duration of the kymograph is 17 mins. Cartoon depicts recruitment, F-actin polymerization or cell shape status corresponding to the kymograph. **(C)** Box-and-whisker plot of neutrophil cell area before (black) or after (red) 488 nm laser was turned on.  $n_c=11$  from at least 3 independent experiments; ns denotes  $P>0.05$  (Wilcoxon-Mann-Whitney rank sum test). Centroid tracks of neutrophils ( $n_c=11$ ) showing random motility before **(D)** or after **(E)** 488 nm laser was turned on. Each track lasts at least 5 mins and was reset to same origin. Box-and-whisker plots of neutrophil speed **(F)** and aspect ratio **(G)** before (black) or after (red) 488 nm laser was switched on.  $n_c=11$  from at least 3 independent experiments; ns denotes  $P>0.05$  (Wilcoxon-Mann-Whitney rank sum test). **(H)** Time-lapse confocal images of differentiated HL-60 neutrophil expressing CRY2PHR-mcherry2-CTRL (control; red; upper panel) and LifeActmiRFP703 (cyan; lower panel), before or after 488 nm laser was switched on globally. Time in min:sec format. Scale bars represent 5  $\mu\text{m}$ . **(I)** Representative kymograph of cortical LifeAct intensity in CTRL-expressing neutrophil before or after 488 nm laser was turned on. A linear color map shows that blue is the lowest LifeAct intensity whereas yellow is the highest. Duration of the kymograph is 18 mins. Cartoon depicts membrane recruitment, actin polymerization or cell shape status corresponding to the kymograph. **(J)** Box-and-whisker plot of cell area before (black) or after (red) CTRL membrane recruitment.  $n_c=14$  from at least 3 independent experiments; ns denotes  $P>0.05$  (Wilcoxon-Mann-Whitney rank sum test). Centroid tracks of neutrophils ( $n_c=14$ ) showing random motility before **(K)** or after **(L)** CTRL membrane recruitment. Each track lasts at least 5 mins and was reset to same origin. Box-and-whisker plots of neutrophil speed **(M)** and aspect ratio **(N)** before (black) or after (red) CTRL recruitment.  $n_c=14$  from at least 3 independent experiments; ns denotes  $P>0.05$  (Wilcoxon-Mann-Whitney rank sum test).

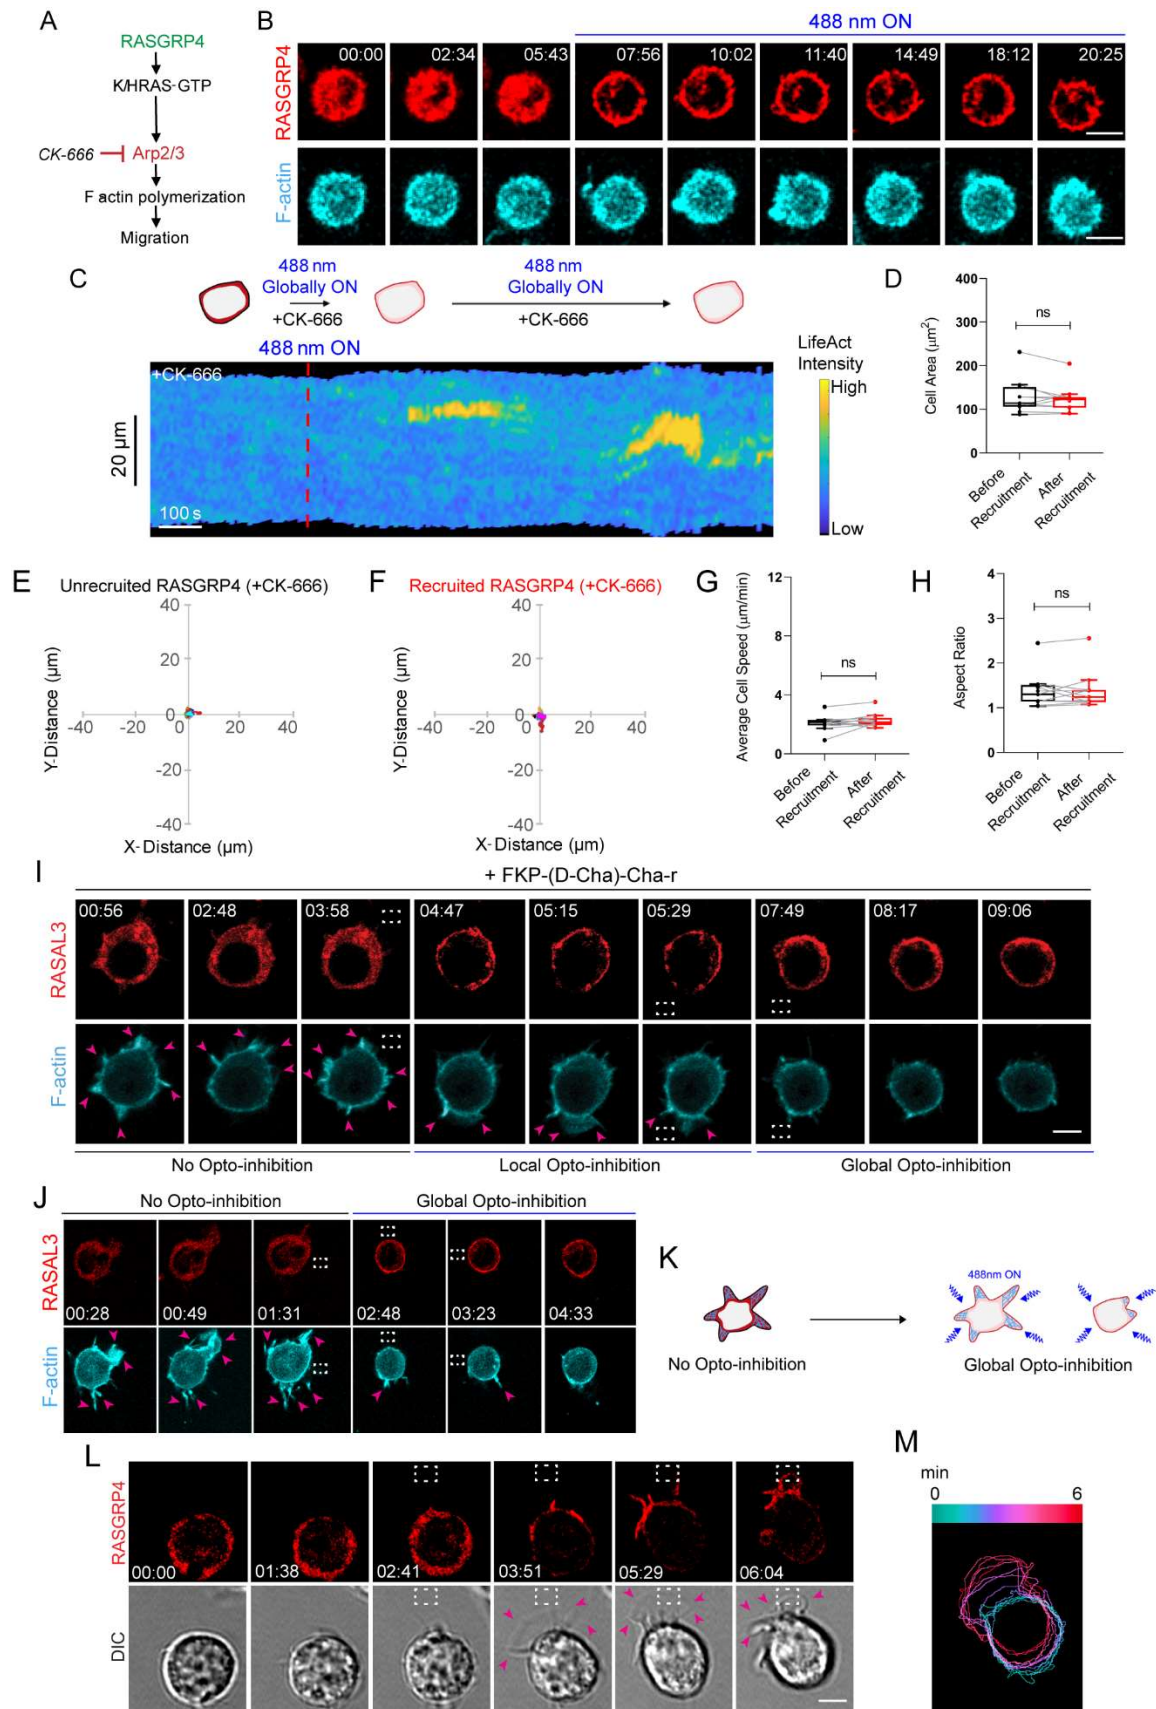

**Figure S4. Global and local recruitment of RasGRP4 or RASAL3 activates or inhibits Arp2/3-mediated actin-based protrusions and motility in neutrophils and macrophages.** Related to Figures 3 and 4. **(A)** Experimental scheme to test whether RasGRP4 activation promotes F-actin polymerization and migration through Arp2/3 complex. CK-666 was the inhibitor used to test this. **(B)** Time-lapse confocal images of CK-666-treated HL-60 neutrophil expressing CRY2PHR-mcherry2-RasGRP4 (red; upper panel) and LifeActmiRFP703 (cyan; lower panel), before or after 488 nm laser was turned on globally. Time in min:sec format. Scale bars represent 5  $\mu$ m. **(C)** Representative kymograph of cortical LifeAct intensity in CK-666-treated RasGRP4-expressing neutrophil before or after 488 nm laser was turned on. A linear color map shows that blue is the lowest LifeAct intensity whereas yellow is the highest. Duration of the kymograph is 21 mins. Cartoon depicts membrane recruitment, actin polymerization or cell shape status corresponding to the kymograph. **(D)** Box-and-whisker plot of cell area before (black) or after (red) RasGRP4 membrane recruitment.  $n_c=11$  from at least 3 independent experiments; ns denotes  $P>0.05$  (Wilcoxon-Mann-Whitney rank sum test). Centroid tracks of CK-666-treated neutrophils ( $n_c=11$ ) showing random motility before **(E)** or after **(F)** RasGRP4 membrane recruitment. Each track lasts at least 5 mins and was reset to same origin. Box-and-whisker plots of speed **(G)** and aspect ratio **(H)** before (black) or after (red) RasGRP4 recruitment in CK-666-treated neutrophils.  $n_c=11$  from at least 3 independent experiments; ns denotes  $P>0.05$  (Wilcoxon-Mann-Whitney rank sum test). **(I)** Time-lapse confocal images of FKP-(D-Cha)-Cha-r-treated RAW 264.7 macrophage expressing CRY2PHR-mcherry2-RASAL3 (red; upper panel) and LifeAct-Halo (cyan; lower panel). Activated macrophage had multiple F-actin-rich protrusions (marked by LifeAct) around its perimeter, as shown by pink arrows (No Opto-inhibition). Next, RASAL3 was recruited to protrusions by applying 488 nm laser near it, as shown by the dashed white box. Protrusions disappeared at site of recruitment and only formed at the cortex where RASAL3 was mostly absent (Local Opto-inhibition). Pink arrows highlight these protrusions. Finally, RASAL3 was recruited over the entire periphery, after 488 nm light was applied all around the cell. It shrank the cell and LifeAct-containing protrusions soon disappeared (Global Opto-inhibition). Images are representative of many cells from at least three independent experiments. Time in min:sec format. Scale bars represent 5  $\mu$ m. **(J)** Time-lapse confocal images of HL-60 neutrophil expressing CRY2PHR-mcherry2-RASAL3 (red; upper panel) and LifeActmiRFP703 (cyan; lower panel). Unpolarized, non-migratory neutrophil had multiple F-actin-rich protrusions around its perimeter, as shown by pink arrows (No Opto-inhibition). RASAL3 recruitment over the entire periphery, after 488 nm light was applied all around the cell, caused the cell to shrink and LifeAct-containing protrusions soon disappeared (Global Opto-inhibition). Pink arrows highlight cellular protrusions. Region of blue light illumination is shown by the dashed white box. Images are representative of many cells from at least three independent experiments. Time in min:sec format. Scale bars represent 5  $\mu$ m. **(K)** Cartoon illustrating RASAL3-mediated phenomenon seen in (A, 'Global Opto-inhibition') and (B). **(L)** Time-lapse confocal images of quiescent RAW264.7 macrophage expressing CRY2PHR-mcherry2-RasGRP4 (red; upper panel). RasGRP4 is recruited continuously to one side of the unpolarized cell by applying 488 nm laser near it, as shown by the dashed white box. Pink arrows highlight RasGRP4-induced new protrusions which make the cell move towards the light source (DIC). Time in min:sec format. Scale bars represent 5  $\mu$ m. **(M)** Color-coded (at 30 sec intervals) outlines of the cell shown in (A).



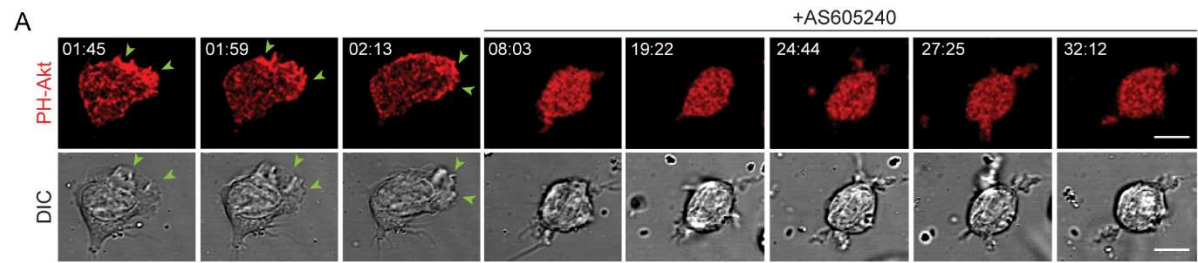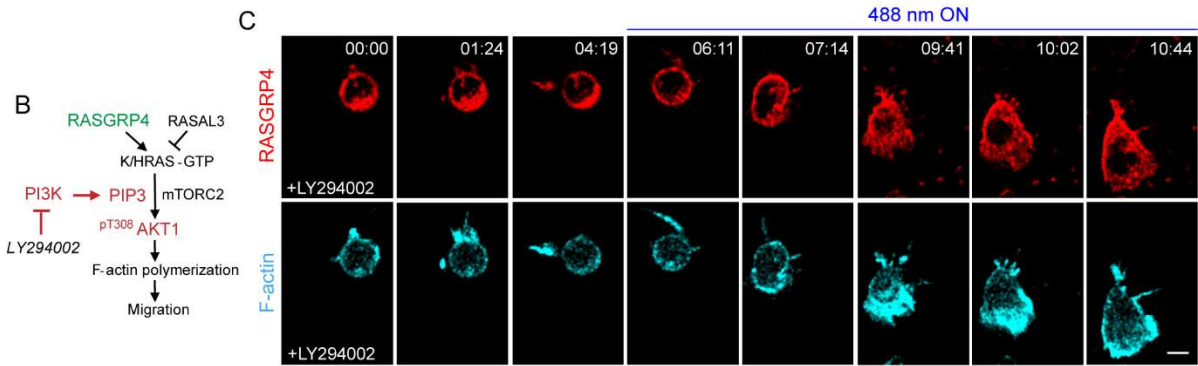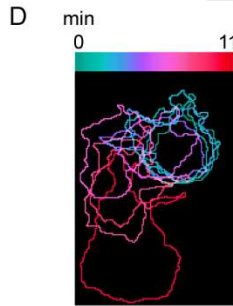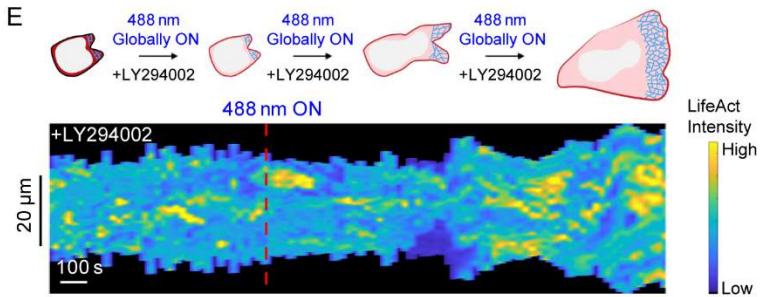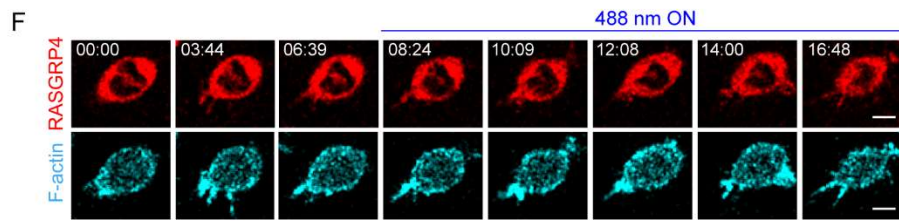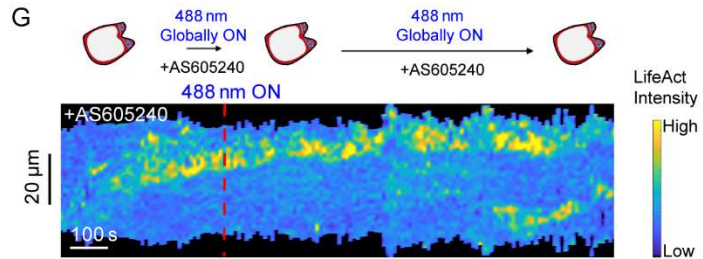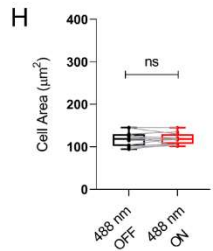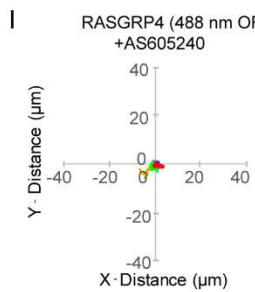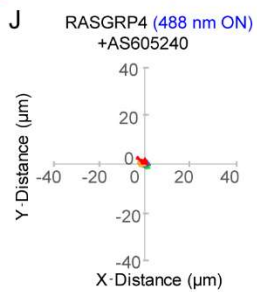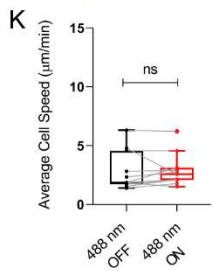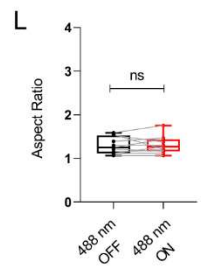

**Figure S5. Global RasGRP4 recruitment can activate neutrophil in presence of multiple PI3K inhibitors.** Related to Figure 5. **(A)** Time-lapse confocal images of AS605240-treated HL-60 neutrophil expressing RFP-PH-Akt (red). Green arrows show PH-Akt localization or PIP3 accumulation on protrusions (DIC). Images are representative of many cells from at least three independent experiments. Time in min:sec format. Scale bars represent 5  $\mu\text{m}$ . **(B)** Experimental scheme to test whether RasGRP4-mediated Ras activation can promote F-actin polymerization and migration in presence of pan-PI3K inhibitor, LY294002. **(C)** Time-lapse confocal images of LY294002-treated HL-60 neutrophil expressing CRY2PHR-mcherry2-RasGRP4 (red; upper panel) and LifeActmiRFP703 (cyan; lower panel), before or after 488 nm laser was switched on globally. Time in min:sec format. Scale bars represent 5  $\mu\text{m}$ . **(D)** Color-coded (at 1 min intervals) outlines of the cell shown in (B). **(E)** Representative kymograph of cortical LifeAct intensity in LY294002-treated RasGRP4-expressing neutrophil before or after 488 nm laser was turned on. A linear color map shows that blue is the lowest LifeAct intensity whereas yellow is the highest. Duration of the kymograph is 11 mins. Cartoon depicts recruitment, F-actin polymerization or cell shape status corresponding to the kymograph. **(F)** Time-lapse confocal images of AS605240-treated HL-60 neutrophil expressing CRY2PHR-mcherry2-RasGRP4 (red; upper panel) and LifeActmiRFP703 (cyan; lower panel), before or after 488 nm laser was switched on globally. No appreciable RasGRP4 recruitment was observed presumably due to low expression of CIBN-CAAX membrane anchor. Time in min:sec format. Scale bars represent 5  $\mu\text{m}$ . **(G)** Representative kymograph of cortical LifeAct intensity in AS605240-treated RasGRP4-expressing neutrophil before or after 488 nm laser was turned on. A linear color map shows that blue is the lowest LifeAct intensity whereas yellow is the highest. Duration of the kymograph is 17 mins. Cartoon depicts recruitment, F-actin polymerization or cell shape status corresponding to the kymograph. **(H)** Box-and-whisker plot of neutrophil cell area before (black) or after (red) 488 nm laser was turned on.  $n_c=11$  from at least 3 independent experiments; ns denotes  $P>0.05$  (Wilcoxon-Mann-Whitney rank sum test). Centroid tracks of AS605240-treated neutrophils ( $n_c=11$ ) showing random motility before **(I)** or after **(J)** 488 nm laser was turned on. Each track lasts at least 5 mins and was reset to same origin. Box-and-whisker plots of neutrophil speed **(K)** and aspect ratio **(L)** before (black) or after (red) 488 nm laser was switched on.  $n_c=11$  from at least 3 independent experiments; ns denotes  $P>0.05$  (Wilcoxon-Mann-Whitney rank sum test).

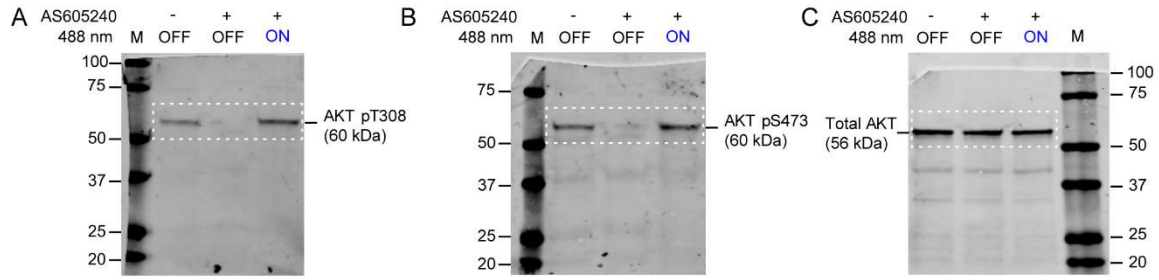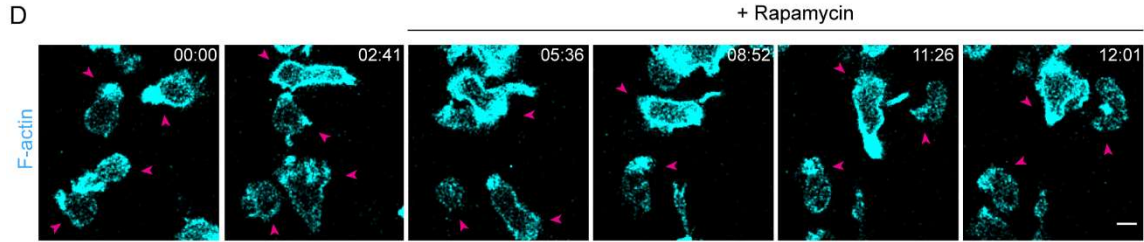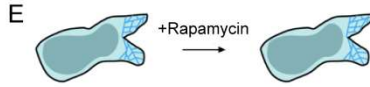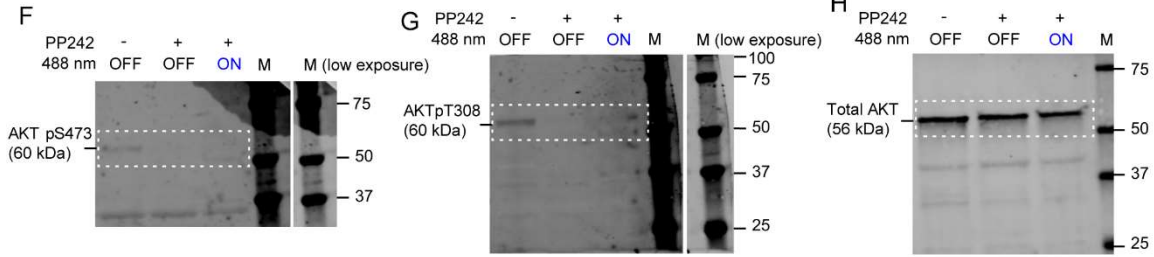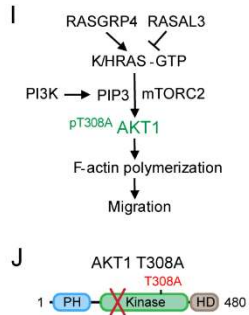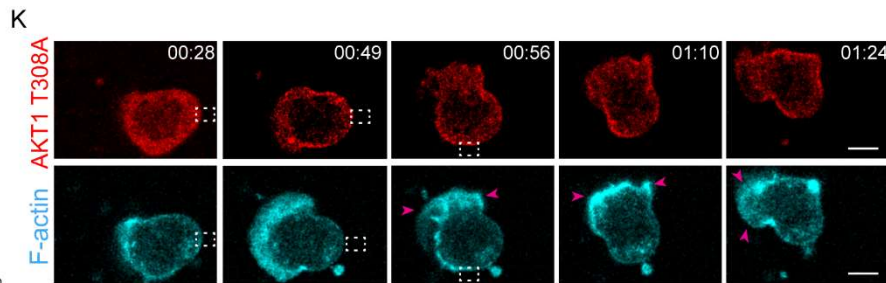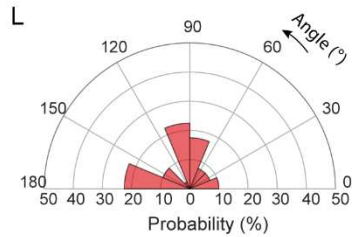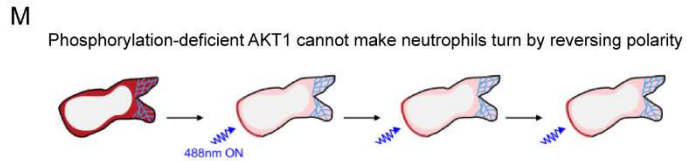

**Figure S6. RasGRP4 activates Akt which rearranges pre-existing polarity via mTorC2 complex, and not mTorC1.** Related to Figures 5 and 6. Uncropped western blots showing (A) phospho-Akt at T308 (60 kDa), (B) phospho-Akt at S473 (60 kDa), and (C) total Akt (56 kDa) status in untreated/unrecruited, AS605240-treated/unrecruited or AS605240-treated/RasGRP4-recruited whole cell lysates. Molecular weight markers indicated for each. White dotted boxes indicate cropped regions shown in Figure 5I. (D) Time-lapse confocal images of rapamycin-treated HL-60 neutrophils expressing LifeActmiRFP703 (cyan). Pink arrows show representative cells which have not lost polarity or show any deformity in shape or size after rapamycin treatment. Images are representative of many cells from at least three independent experiments. Time in min:sec format. Scale bars represent 5  $\mu\text{m}$ . (E) Cartoon depicting rapamycin treatment does not affect neutrophil shape or F-actin polymerization. Uncropped western blots showing (F) phospho-Akt at S473 (60 kDa), (G) phospho-Akt at T308 (60 kDa), and (H) total Akt (56 kDa) status in untreated/unrecruited, PP242-treated/unrecruited or PP242-treated/RasGRP4-recruited whole cell lysates. Molecular weight markers indicated for each. White dotted boxes indicate cropped regions shown in Figure 5R. (I) Experimental scheme testing if phospho-dead Akt1<sub>T308A</sub> optical recruitment can promote F-actin polymerization and migration. (J) Cartoon of Akt1<sub>T308A</sub> protein sequence with PH, kinase, and hypervariable domains. Due to T308A mutation, phosphorylation and kinase activity are absent. (K) Time-lapse confocal images of differentiated HL-60 neutrophil expressing CRY2PHR-mcherry2-Akt1<sub>T308A</sub> (red; upper panel) and LifeActmiRFP703 (cyan; lower panel). Akt1<sub>T308A</sub> is recruited exclusively to the cell rear by shining 488 nm laser near it, as indicated by the dashed white box. Pink arrows indicate new protrusions forming at the opposite end. Time in min:sec format. Scale bars represent 5  $\mu\text{m}$ . (L) Polar histogram demonstrates Akt1<sub>T308A</sub> recruitment does not bias new protrusion formation;  $n_c=15$  and  $n_p=40$ . (M) Cartoon illustrating that optically recruiting phosphorylation-deficient, kinase-dead Akt1<sub>T308A</sub> at the cell back has no effect on neutrophil polarity.

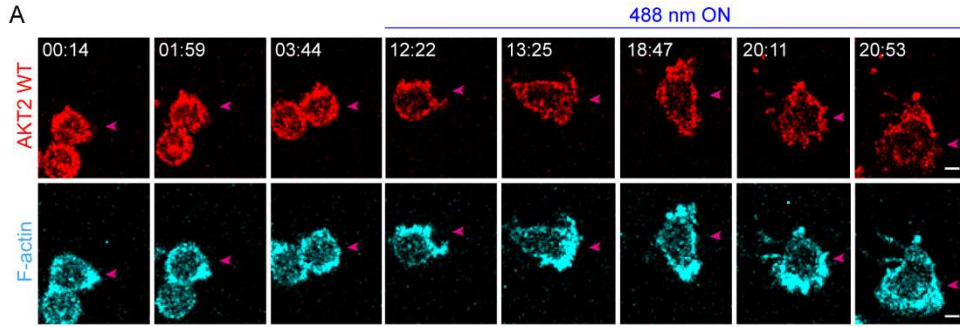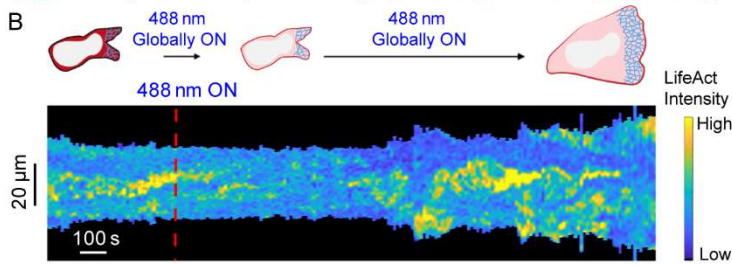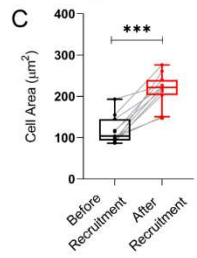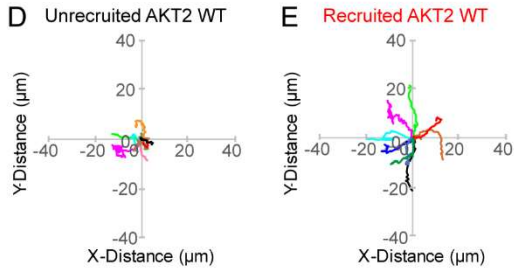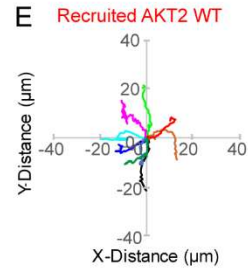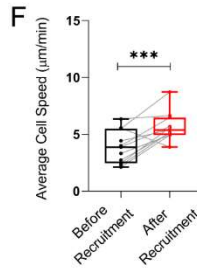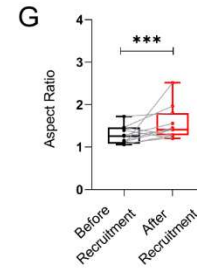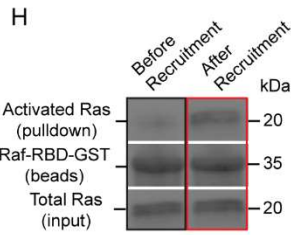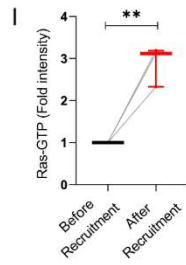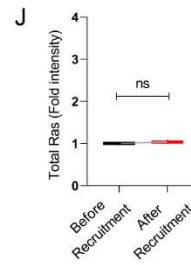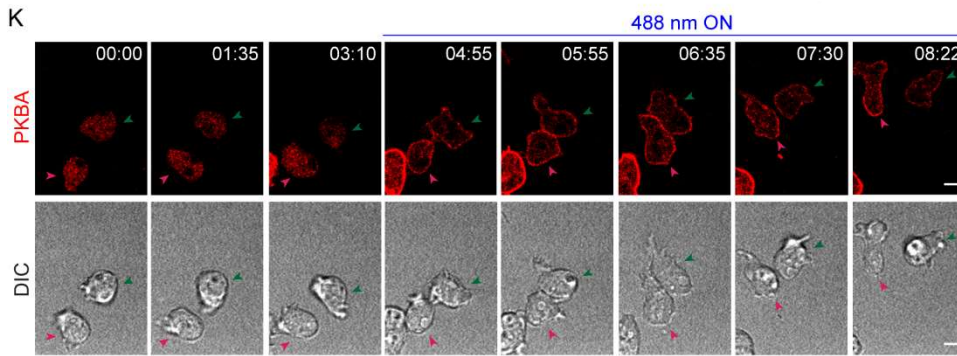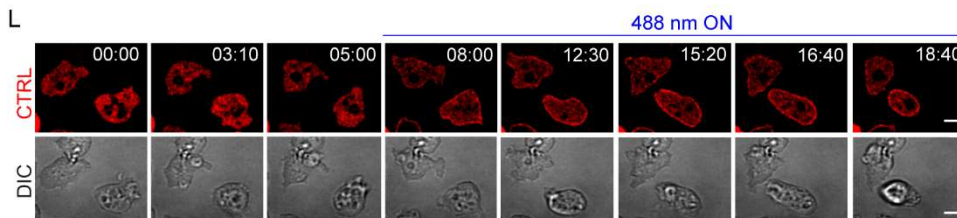

**Figure S7. Global recruitment of Akt2 or PKBA improves neutrophil polarity and migration.**

Related to Figure 6. **(A)** Time-lapse confocal images of differentiated HL-60 neutrophil expressing CRY2PHR-mcherry2-AKT2 WT (red; upper panel) and LifeActmiRFP703 (cyan; lower panel), before or after 488 nm laser was switched on globally. Pink arrows denote representative cell. Time in min:sec format. Scale bars represent 5  $\mu\text{m}$ . **(B)** Representative kymograph of cortical LifeAct intensity in Akt2 WT-expressing neutrophil before or after 488 nm laser was turned on. A linear color map shows that blue is the lowest LifeAct intensity whereas yellow is the highest. Duration of the kymograph is 23 mins. Cartoon depicts recruitment, F-actin polymerization or cell shape status corresponding to the kymograph. **(C)** Box-and-whisker plot of neutrophil cell area before (black) or after (red) CRY2PHR-mcherry2-Akt2 WT membrane recruitment.  $n_c=11$  from at least 3 independent experiments; asterisks indicate significant difference,  $***P \leq 0.001$  (Wilcoxon-Mann-Whitney rank sum test). Centroid tracks of neutrophils ( $n_c=11$ ) showing random motility before **(D)** or after **(E)** Akt2 WT membrane recruitment. Each track lasts at least 5 mins and was reset to same origin. Box-and-whisker plots of neutrophil speed **(F)** and aspect ratio **(G)** before (black) or after (red) Akt2 WT membrane recruitment.  $n_c=11$  from at least 3 independent experiments; asterisks indicate significant difference,  $***P \leq 0.001$  (Wilcoxon-Mann-Whitney rank sum test). **(H)** Representative western blot showing active Ras levels after pulldown (top panel), Raf-RBD-GST in beads (loading control; middle panel) and total Ras (input; lower panel) of unrecruited or Akt2 WT-recruited samples. Fold intensities of **(I)** activated and **(J)** total Ras in unrecruited or Akt2-recruited samples. Data is shown as mean $\pm$ SD from 3 independent experiments; asterisks indicate significant difference,  $**P \leq 0.01$ , and ns denotes  $P>0.05$  (Wilcoxon-Mann-Whitney rank sum test). **(K)** Time-lapse confocal images of vegetative *Dictyostelium* expressing tgRFPt-SSPB R73Q-PKBA (red; upper panel), before or after 488 nm laser was switched on globally. Within minutes of PKBA recruitment, previously non-polarized cells formed sustained protrusions and started migrating (DIC; lower panel). Pink and green arrows are provided to demarcate the two cells throughout the images. These are representative of many cells from at least three independent experiments. Time in min:sec format. Scale bars represent 5  $\mu\text{m}$ . **(L)** Time-lapse confocal images of vegetative *Dictyostelium* expressing tgRFPt-SSPB R73Q-CTRL (control, red; upper panel), before or after 488 nm laser was switched on globally. Non-polarized cells do not polarize or migrate once CTRL is recruited to the membrane (DIC; lower panel). These images are representative of many cells from at least three independent experiments. Time in min:sec format. Scale bars represent 5  $\mu\text{m}$ .

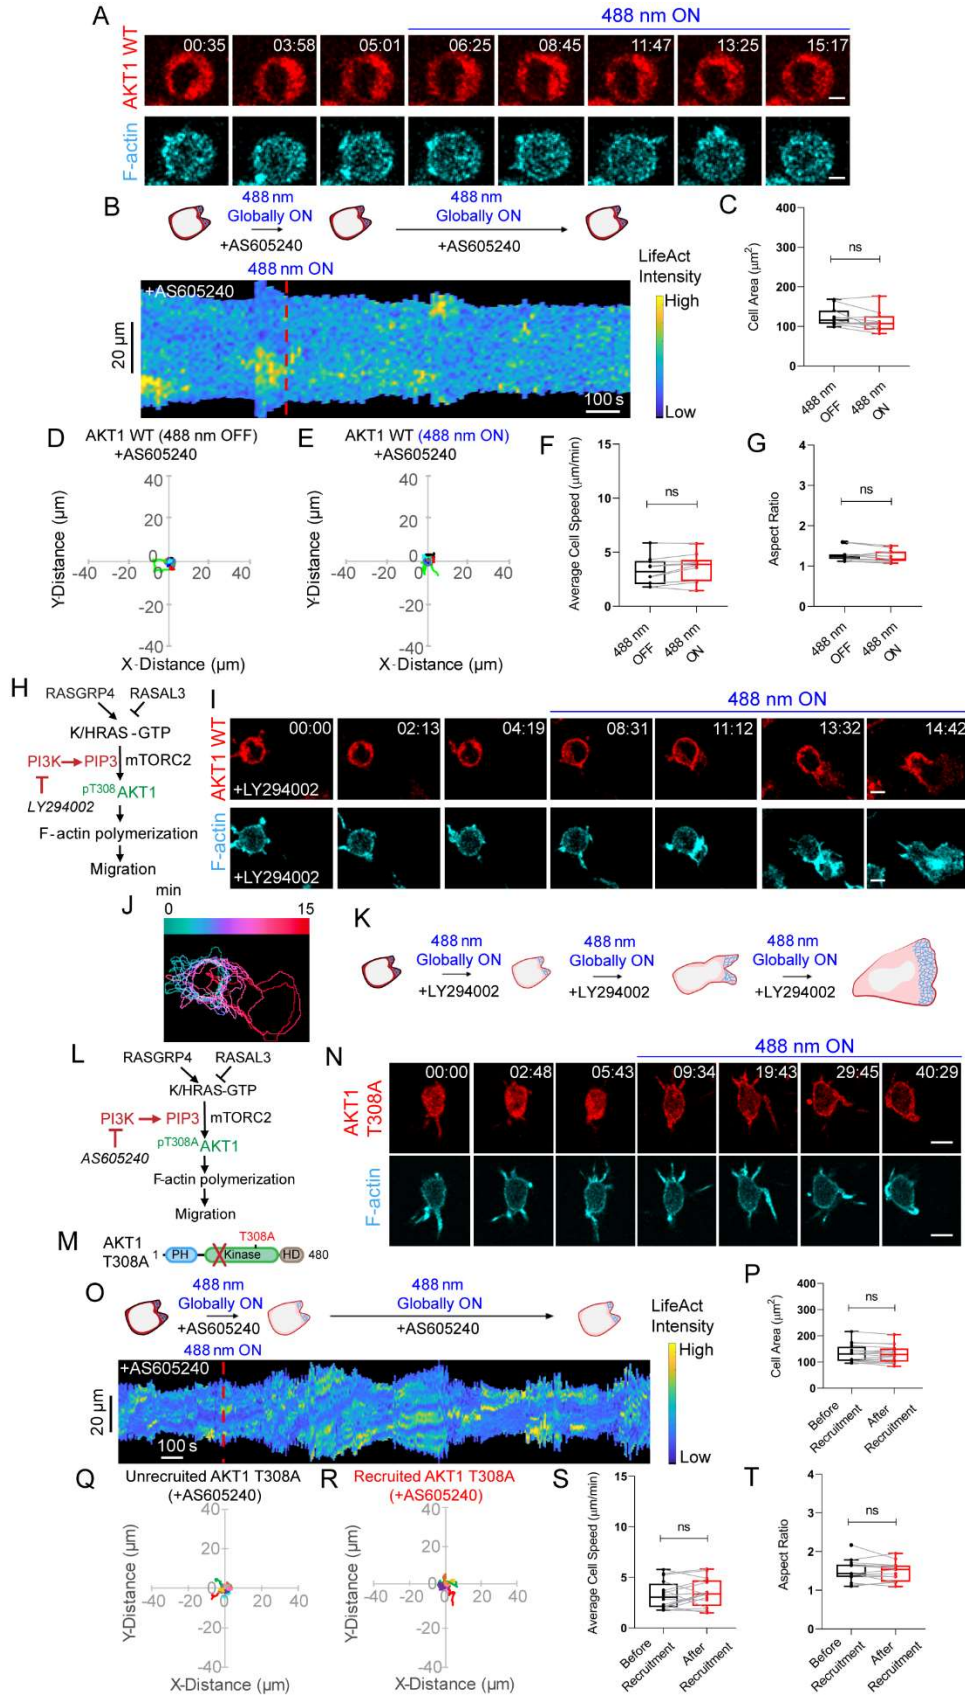

**Figure S8. Recruited Akt1, through its T308 phosphorylation, polarizes neutrophil migration even in presence of multiple PI3K inhibitors.** Related to Figure 6. **(A)** Time-lapse confocal images of AS605240-treated HL-60 neutrophil expressing CRY2PHR-mcherry2-Akt1 WT (red; upper panel) and LifeActmiRFP703 (cyan; lower panel), before or after 488 nm laser was switched on globally. No appreciable Akt1 WT recruitment was observed presumably due to low expression of CIBN-CAAX membrane anchor. Time in min:sec format. Scale bars represent 5  $\mu\text{m}$ . **(B)** Representative kymograph of cortical LifeAct intensity in AS605240-treated Akt1 WT-expressing neutrophil before or after 488 nm laser was turned on. A linear color map shows that blue is the lowest LifeAct intensity whereas yellow is the highest. Duration of the kymograph is 16 mins. Cartoon depicts recruitment, F-actin polymerization or cell shape status corresponding to the kymograph. **(C)** Box-and-whisker plot of neutrophil cell area before (black) or after (red) 488 nm laser was turned on.  $n_c=10$  from at least 3 independent experiments; ns denotes  $P>0.05$  (Wilcoxon-Mann-Whitney rank sum test). Centroid tracks of AS605240-treated neutrophils ( $n_c=10$ ) showing random motility before **(D)** or after **(E)** 488 nm laser was turned on. Each track lasts at least 5 mins and was reset to same origin. Box-and-whisker plots of neutrophil speed **(F)** and aspect ratio **(G)** before (black) or after (red) 488 nm laser was switched on.  $n_c=10$  from at least 3 independent experiments; ns denotes  $P>0.05$  (Wilcoxon-Mann-Whitney rank sum test). **(H)** Experimental scheme to test whether Akt1 WT recruitment can activate F-actin polymerization and migration in presence of pan-PI3K inhibitor, LY294002. **(I)** Time-lapse confocal images of LY294002-treated HL-60 neutrophil expressing CRY2PHR-mcherry2-Akt1 WT (red; upper panel) and LifeActmiRFP703 (cyan; lower panel), before or after 488 nm laser was switched on globally. Time in min:sec format. Scale bars represent 5  $\mu\text{m}$ . **(J)** Color-coded (at 1 min intervals) outlines of the cell shown in (B). **(K)** Cartoon depicts recruitment, F-actin polymerization or cell shape status corresponding to images in (B). **(L)** Experimental scheme testing if phospho-dead Akt1<sub>T308A</sub> optical recruitment can overcome PI3K $\gamma$  inhibition. **(M)** Cartoon of Akt1<sub>T308A</sub> protein sequence with PH, kinase, and hypervariable domains. Due to T308A mutation, phosphorylation and kinase activity are absent. **(N)** Time-lapse confocal images of AS605240-treated HL-60 neutrophil expressing CRY2PHR-mcherry2- Akt1<sub>T308A</sub> (red; upper panel) and LifeActmiRFP703 (cyan; lower panel), before or after 488 nm laser was switched on globally. Time in min:sec format. Scale bars represent 5  $\mu\text{m}$ . **(O)** Representative kymograph of cortical LifeAct intensity in AS605240-treated Akt1<sub>T308A</sub>-expressing neutrophil before or after 488 nm laser was turned on. A linear color map shows that blue is the lowest LifeAct intensity whereas yellow is the highest. Duration of the kymograph is 46 mins. Cartoon depicts recruitment, F-actin polymerization or cell shape status corresponding to the kymograph. **(P)** Box-and-whisker plot of cell area before (black) or after (red) Akt1<sub>T308A</sub> membrane recruitment.  $n_c=16$  from at least 3 independent experiments; ns denotes  $P>0.05$  (Wilcoxon-Mann-Whitney rank sum test). Centroid tracks of neutrophils ( $n_c=16$ ) showing random motility before **(Q)** or after **(R)** Akt1<sub>T308A</sub> membrane recruitment. Each track lasts at least 5 mins and was reset to same origin. Box-and-whisker plots of cell speed **(S)** and aspect ratio **(T)** before (black) or after (red) Akt1<sub>T308A</sub> recruitment.  $n_c=16$  from at least 3 independent experiments; ns denotes  $P>0.05$  (Wilcoxon-Mann-Whitney rank sum test).



**Table S1. Oligonucleotides used in this paper.** Related to STAR Methods.

| <b>Primer</b> | <b>Primer Sequence (5'-3')<sup>a</sup></b>                           | <b>Purpose</b>                   |
|---------------|----------------------------------------------------------------------|----------------------------------|
| P1            | <i>CGCGCTAGCCGCCACCATGAATGGAGCTATAGGAGGTGACCTTTTGCTC</i>             | Cloning of CIBN-CAAX             |
| P2            | <i>GCGGAATTCTTACTACATAATTACACACTTTG</i>                              |                                  |
| P3            | <i>CGCGCTAGCGCCACCATGGGCGTGGCCGACTTGATCAAGAA</i>                     | Cloning of LifeActmiRFP703       |
| P4            | <i>GCGGAATTCTTAGCTCTCAAGCGCGGTGATCCGCGT</i>                          |                                  |
| P5            | <i>CGCCTCGAGGCCACCATGAAGATGGACAAAAAGACTATAGTTTG</i>                  | Cloning of CRY2PHR-mcherry2      |
| P6            | <i>GCGGCGGCCGCCTCCGGAACCCCCTGCCCCAGCCTTGACAGCTCGTCCATGCC</i>         |                                  |
| P7            | <i>CGCTCCGGAACGGAATATAAGCTGGTGGTGGTGGGC</i>                          | Cloning of HRas G12V ΔCAAX       |
| P8            | <i>GCGGTCGACTCACTTGCAGCTCATGCAGCCGGG</i>                             |                                  |
| P9            | <i>CGCTCCGGAACTGAATATAAACTTGTGGTAGTTGGAGCTGTTGGC</i>                 | Cloning of KRas4B G12V ΔCAAX     |
| P10           | <i>GCGGTCGACTTACTTTGTCTTTGACTTCTTTTTCTTTTACCATCTTTGC</i>             |                                  |
| P11           | <i>CGCTCCGGAACAGAAAAGACAGTAAGAGGAAGTCCCAC</i>                        | Cloning of RasGRP4               |
| P12           | <i>GCGGTCGACTTAGGAATCCAGCTTGGAGGATGCAGT</i>                          |                                  |
| P13           | <i>CGCGCGGCCGCGATCCCCCGTCCCCCTCACG</i>                               | Cloning of RASAL3                |
| P14           | <i>GCGGCGGCCGCTTAAGTAGTATCCCCGTTACAGGCACGG</i>                       |                                  |
| P15           | <i>CGCTCCGGAAGCGACGTGGCTATTGTGAAGGAGGG</i>                           | Cloning of Akt1                  |
| P16           | <i>GCGGTCGACTCAGGCCGTGCCGCTGGC</i>                                   |                                  |
| P17           | <i>CGCTCCGGAAGCGACGTGGCTATTGTGAAGGAGGG</i>                           | Cloning of Akt1 <sup>T308A</sup> |
| P18           | <i>GCGGTCGACTCAGGCCGTGCCGCTGGC</i>                                   |                                  |
| P19           | <i>CGCTCCGGAATGAGGTGTCTGTCATCAAAGAAGGCTGG</i>                        | Cloning of Akt2                  |
| P20           | <i>GCGTCCGGATCACTCGCGGATGCTGGCC</i>                                  |                                  |
| P21           | <i>CGCTGTACAAGGCTGGGGCAGGGGGTATCCCCCGTCCCCCTCACG</i>                 | Cloning of RASAL3                |
| P22           | <i>GCGGCGGCCGCTTAAGTAGTATCCCCGTTACAGGCACGG</i>                       |                                  |
| P23           | <i>CGCTGTACAAGGCTGGGGCAGGGGGTCCGGAACAGAAAAGACAGTAAGAGG AAGTCCCAC</i> | Cloning of RasGRP4               |
| P24           | <i>GCGGCGGCCGCTTAGGAATCCAGCTTGGAGGATGCAGT</i>                        |                                  |
| P25           | <i>TGGATCCGCTGCTAGCATGTCAACAGCACCAATTAACATG</i>                      | Cloning of PKBA                  |
| P26           | <i>CCGTCGACAGCGGCCGCTTATCTTAAATGTTACAGATTCAGCG</i>                   |                                  |

<sup>a</sup> restriction sites in primer sequences are italicized.
